# Supplementary material for: Co-nucleated Co doped SnO2/SnS2 heterostructures to facilitate diffusion towards high-performance Li and Na ion storage
Source: Royal Society of Chemistry journal article supplement (doi:10.1039/d4qi01941e), 2024-01-01
Supplement: d4qi01941e1.pdf [file d4qi01941e1.pdf]

**Co-nucleated Co doped SnO<sub>2</sub>/SnS<sub>2</sub> heterostructures to facilitate diffusion towards high-performance alkali ion storage**

Kunyu Hao, Ruixiao Zhang, Mingyue Chen, Yu Lu, Pengcheng Qi, Gaofu Liu,  
Yanxin Wang, Hao Wu, Yiwen Tang\*

Institute of Nano-Science and Technology, College of Physical Science and Technology,  
Central China Normal University, Wuhan, 430079, China

\*Corresponding author: Tel: +86-27-67867947; Fax: +86-27-67861185; e-mail:

ywtang@ccnu.edu.cn

## 1. Supporting figures

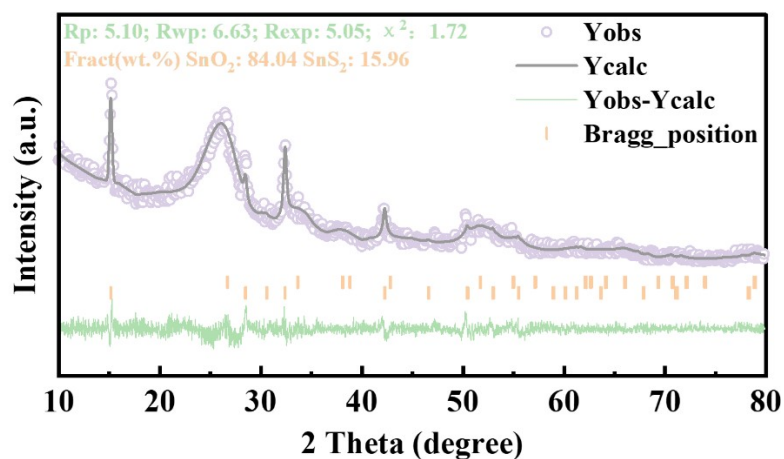

Figure S1. Refined XRD results of  $\text{Co}_{1/3}\text{-SnS}_2/\text{SnO}_2$  samples.

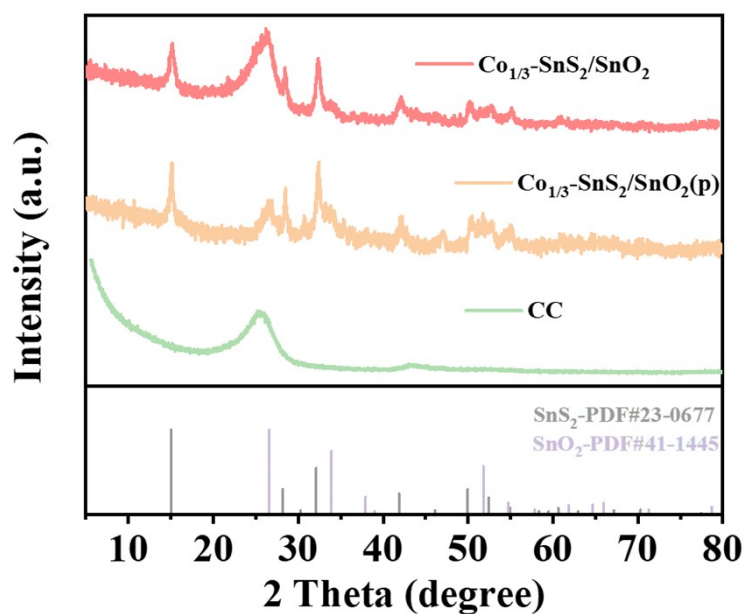

Figure S2. XRD patterns of  $\text{Co}_{1/3}\text{-SnS}_2/\text{SnO}_2$ ,  $\text{Co}_{1/3}\text{-SnS}_2/\text{SnO}_2(\text{p})$  and blank carbon cloth.

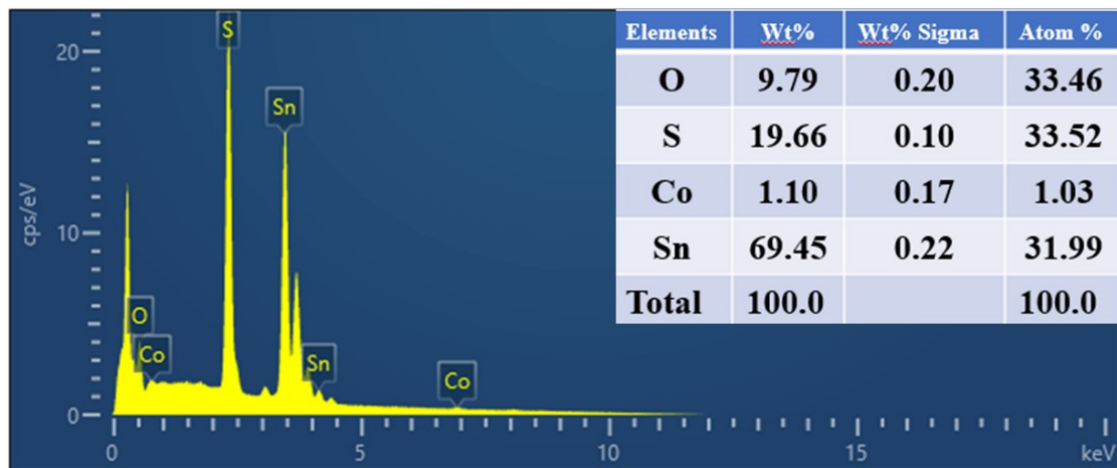

**Figure S3.** Content of each element in the  $\text{Co}_{1/3}\text{-SnS}_2/\text{SnO}_2$  material.

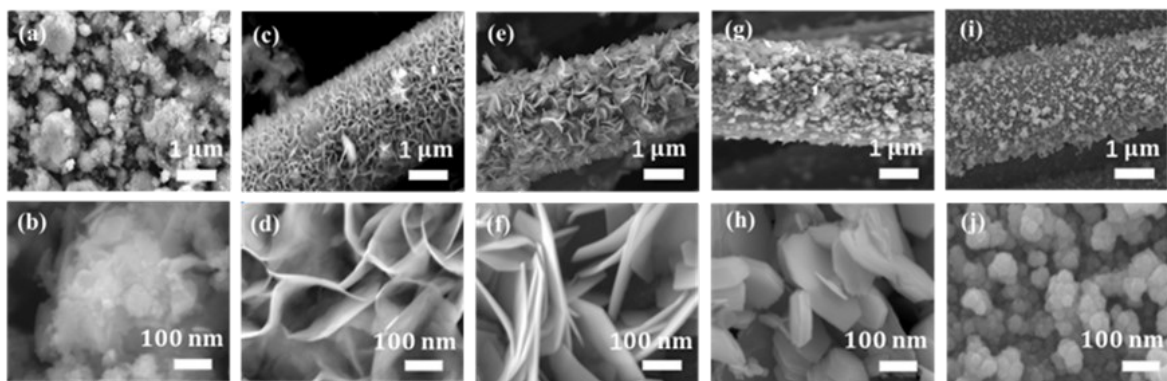

**Figure S4.** SEM images of (a-b)  $\text{Co}_{1/3}\text{-SnS}_2/\text{SnO}_2(\text{p})$ ; (c-d)  $\text{Co}_{1/3}\text{-SnS}_2/\text{SnO}_2$ ; (e-f)  $\text{SnS}_2/\text{SnO}_2$ ; (g-h)  $\text{Co}_{1/3}\text{-SnS}_2$ ; (i-j)  $\text{Co}_{1/3}\text{-SnO}_2$ .

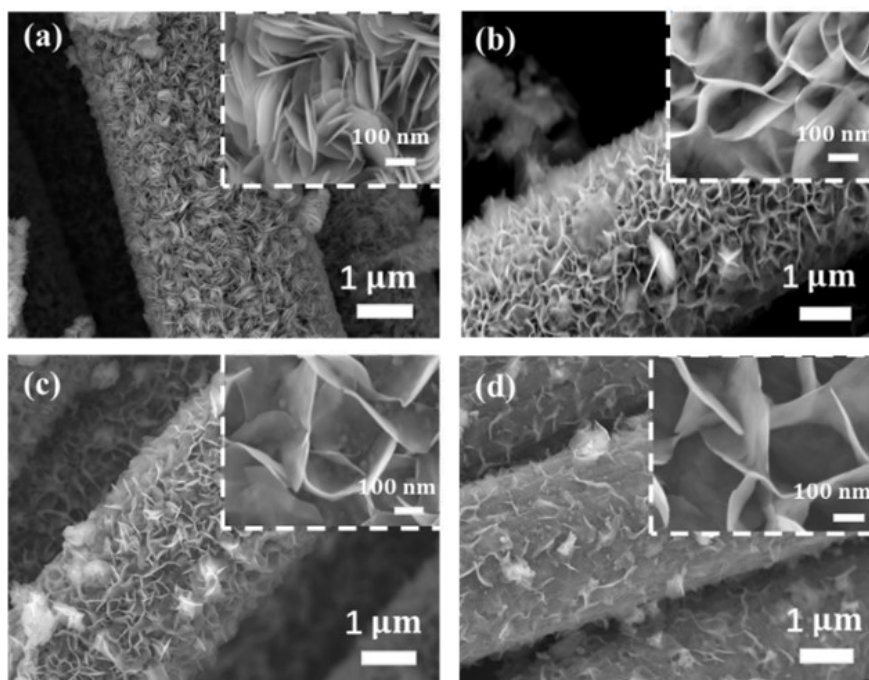

**Figure S5.** SEM images of (a)  $\text{Co}_{1/2}\text{-SnS}_2/\text{SnO}_2$ ; (b)  $\text{Co}_{1/3}\text{-SnS}_2/\text{SnO}_2$ ; (c)  $\text{Co}_{1/4}\text{-SnS}_2/\text{SnO}_2$ ; (d)  $\text{Co}_{1/5}\text{-SnS}_2/\text{SnO}_2$ .

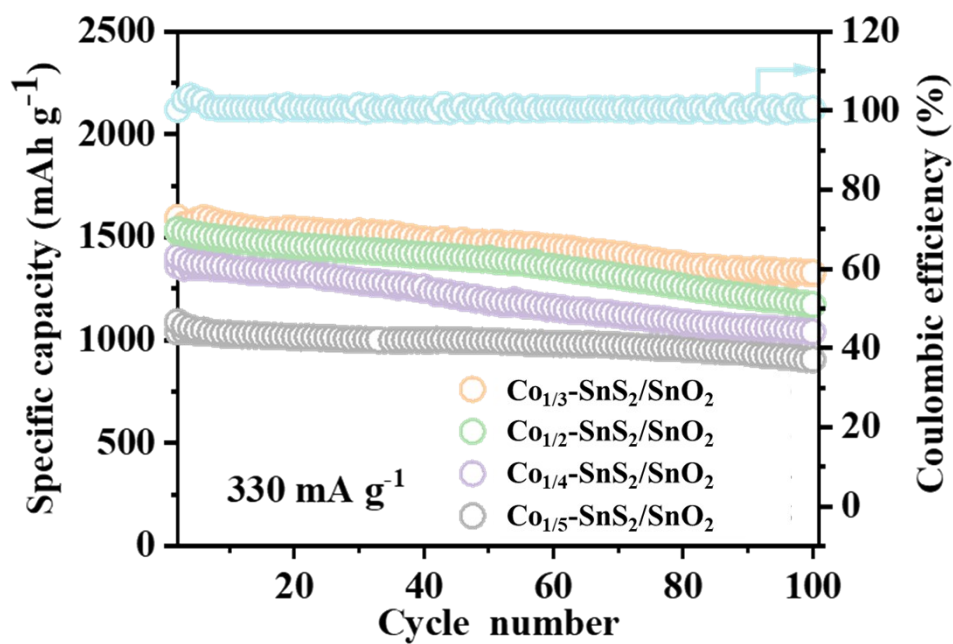

**Figure S6.** The cycling performance of LIBs using the different  $\text{Co}_{1/x}\text{-SnS}_2/\text{SnO}_2$  anodes obtained at different ratio of the  $\text{Co}^{2+}$ .

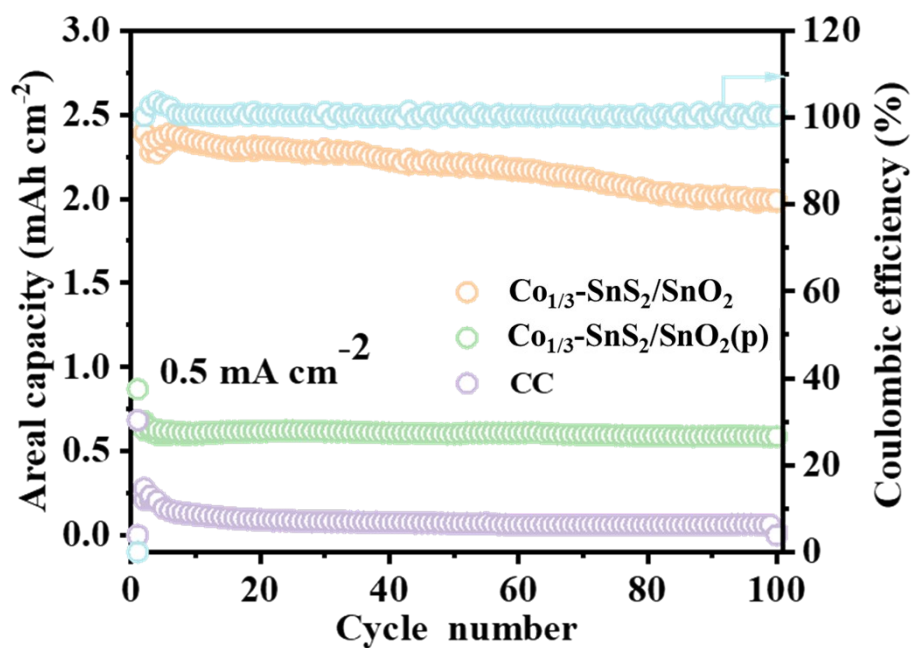

**Figure S7.** The cycling performance of LIBs using the Co<sub>1/3</sub>-SnS<sub>2</sub>/SnO<sub>2</sub>, Co<sub>1/3</sub>-SnS<sub>2</sub>/SnO<sub>2</sub>(p) and CC as anodes.

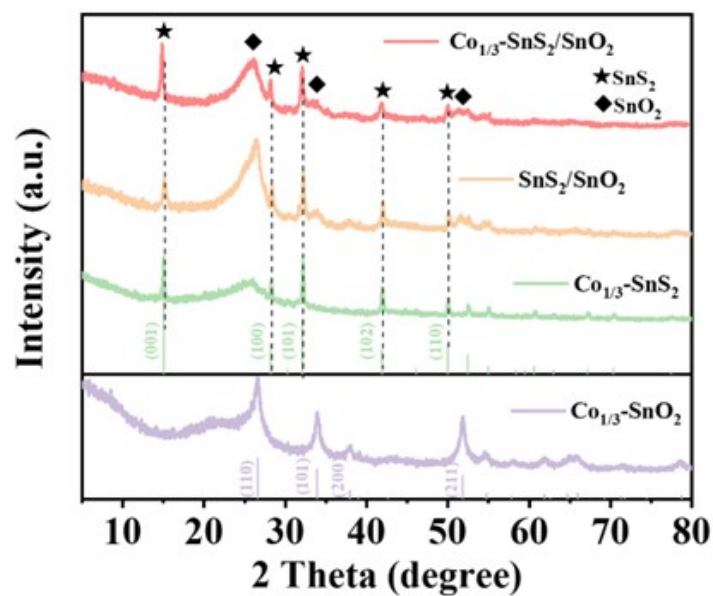

**Figure S8.** XRD patterns of the comparison samples (SnS<sub>2</sub>/SnO<sub>2</sub>, Co<sub>1/3</sub>-SnO<sub>2</sub> and Co<sub>1/3</sub>-SnS<sub>2</sub>)

**Table S1.** Comparison of the performance of this material in lithium-ion batteries with SnS<sub>2</sub> and SnO<sub>2</sub> materials reported in other studies.

| Sample                                                | Capacity (mAh g <sup>-1</sup> ) | Capacity retention | Ref.             |
|-------------------------------------------------------|---------------------------------|--------------------|------------------|
| SnS <sub>2</sub> @RGO                                 | 1800 (0.1 A g <sup>-1</sup> )   | 52.3 % (100 cycle) | [19]             |
| C@SnS <sub>2</sub>                                    | 1200 (0.1 A g <sup>-1</sup> )   | 55 % (100 cycle)   | [29]             |
| SnS <sub>2</sub> -CNT-CC                              | 1500 (0.645 A g <sup>-1</sup> ) | 83 % (100 cycle)   | [32]             |
| SnS <sub>2</sub> /SnO <sub>2</sub> /C                 | 1050 (0.1 A g <sup>-1</sup> )   | 67.8 % (100 cycle) | [33]             |
| SnO <sub>2</sub> @N-CNF                               | 754 (1 A g <sup>-1</sup> )      | 100 % (300 cycle)  | [34]             |
| SnO <sub>2</sub> @SnS <sub>2</sub>                    | 962 (0.1 A g <sup>-1</sup> )    | 56.9 % (100 cycle) | [35]             |
| Co <sub>1/3</sub> -SnS <sub>2</sub> /SnO <sub>2</sub> | 1518 (0.33 A g <sup>-1</sup> )  | 81 % (100 cycle)   | <b>This work</b> |

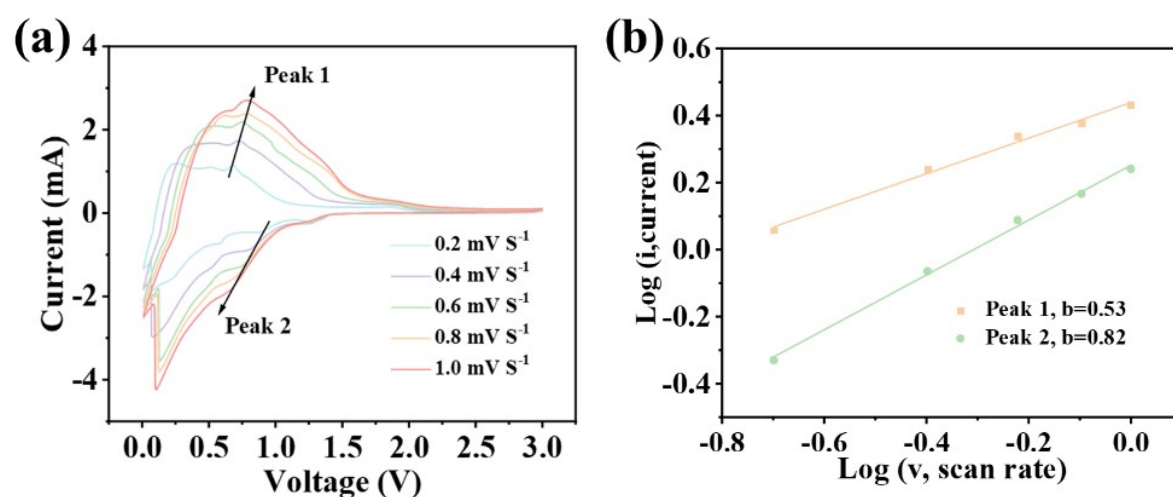

**Figure S9.** (a) The CV curves at different rate of the LIBs using the Co<sub>1/3</sub>-SnS<sub>2</sub>/SnO<sub>2</sub> anodes; (b) Plots of log(i) against log(v) at various peak currents.

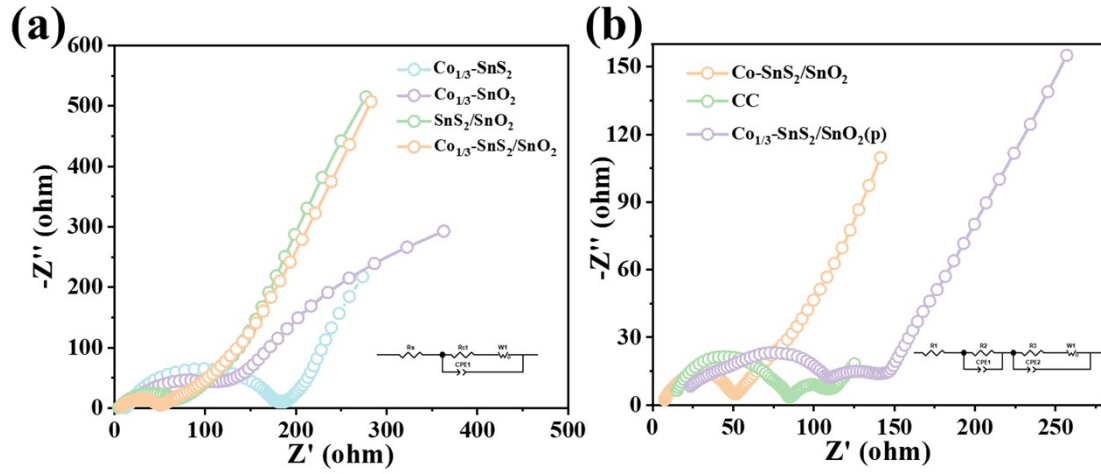

**Figure S10.** The EIS curves of LIBs with (a) Co<sub>1/3</sub>-SnS<sub>2</sub>/SnO<sub>2</sub>, SnS<sub>2</sub>/SnO<sub>2</sub>, Co<sub>1/3</sub>-SnO<sub>2</sub> and Co<sub>1/3</sub>-SnS<sub>2</sub> as anodes; (b) Co<sub>1/3</sub>-SnS<sub>2</sub>/SnO<sub>2</sub>, Co<sub>1/3</sub>-SnS<sub>2</sub>/SnO<sub>2</sub>(p) and blank carbon cloth as anodes;

**Table S2.** Fitted EIS data and dynamic parameters of different materials in LIBs.

| Sample                                                    | R <sub>s</sub> (Ω) | R <sub>ct</sub> (Ω) |
|-----------------------------------------------------------|--------------------|---------------------|
| Co <sub>1/3</sub> -SnS <sub>2</sub>                       | 13.22              | 170.2               |
| Co <sub>1/3</sub> -SnO <sub>2</sub>                       | 10.38              | 156.8               |
| SnS <sub>2</sub> /SnO <sub>2</sub>                        | 4.672              | 75.72               |
| CC                                                        | 10.44              | 73.57               |
| Co <sub>1/3</sub> -SnS <sub>2</sub> /SnO <sub>2</sub> (p) | 12.57              | 121.3               |
| Co <sub>1/3</sub> -SnS <sub>2</sub> /SnO <sub>2</sub>     | 6.242              | 46.8                |

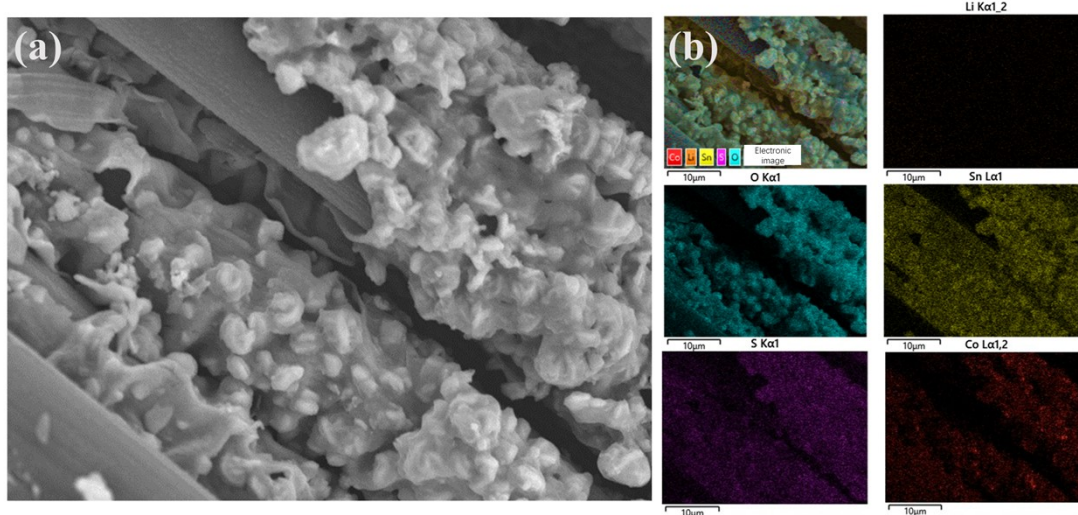

**Figure S11.** (a) SEM image and (b) EDS of  $\text{Co}_{1/3}\text{-SnS}_2/\text{SnO}_2$  anode removed in LIB after 50 cycles at  $300 \text{ mA g}^{-1}$ .

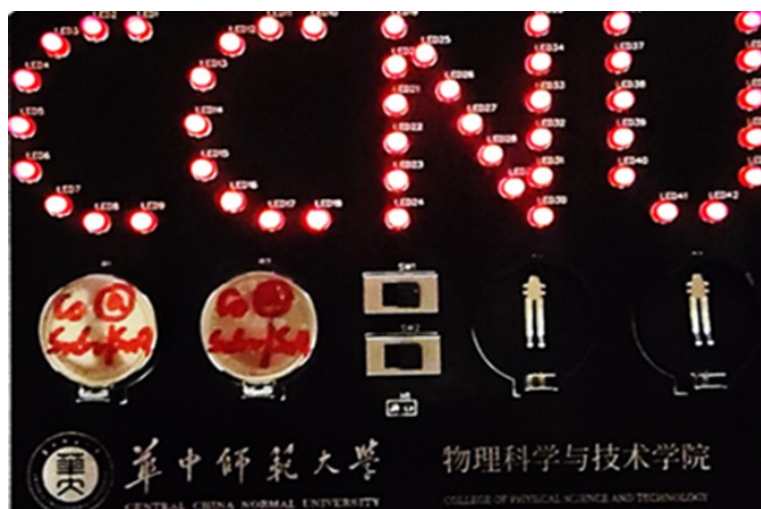

**Figure S12.** LEDs light up with LIBs using  $\text{Co}_{1/3}\text{-SnS}_2/\text{SnO}_2$  anodes



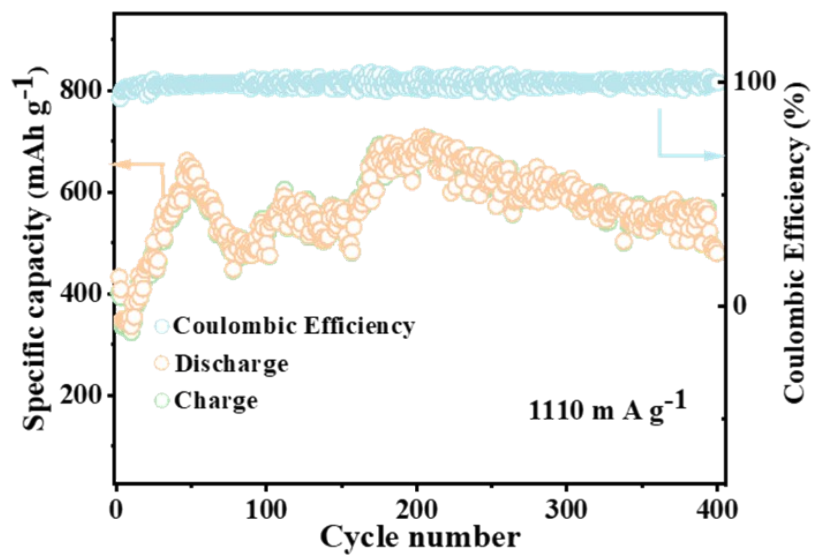

**Figure S13.** The cycling performance of SIBs using the  $\text{Co}_{1/3}\text{-SnS}_2/\text{SnO}_2$  anodes at a current density of  $1110 \text{ mA g}^{-1}$ .

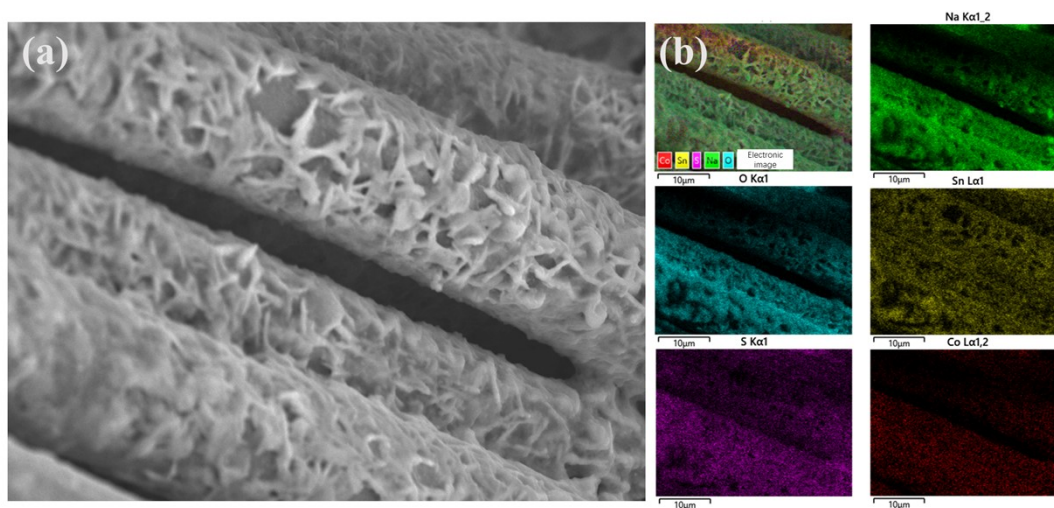

**Figure S14.** (a) SEM image and (b) EDS of anode removed in SIB after 70 cycles at  $300 \text{ mA g}^{-1}$ .

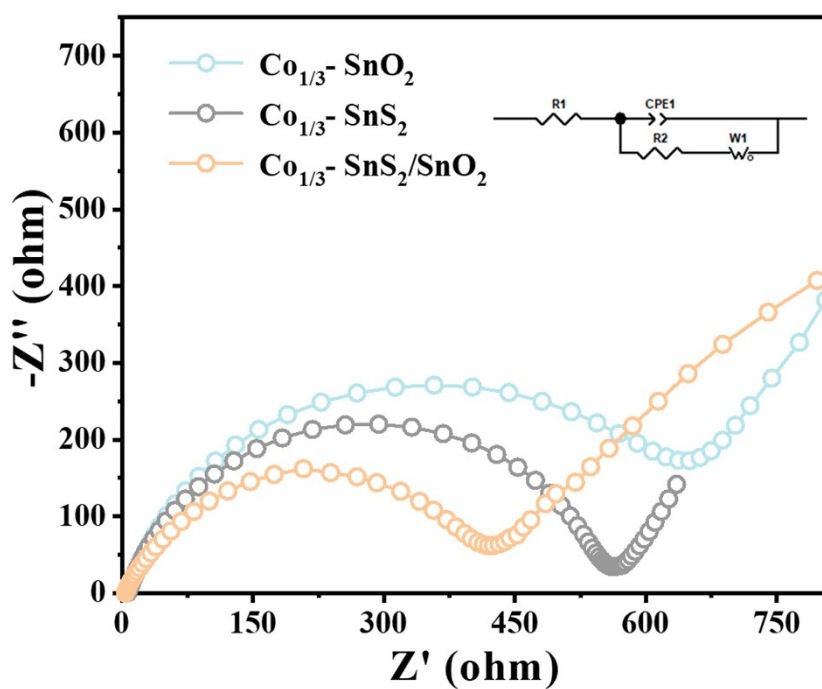

**Figure S15.** The EIS curves of SIBs with  $\text{Co}_{1/3}\text{-SnS}_2/\text{SnO}_2$ ,  $\text{Co}_{1/3}\text{-SnS}_2$  and  $\text{Co}_{1/3}\text{-SnO}_2$  as anodes;

**Table S3.** Fitted EIS data and dynamic parameters of different materials in SIBs.

| Sample                                      | $R_s$ ( $\Omega$ ) | $R_{ct}$ ( $\Omega$ ) |
|---------------------------------------------|--------------------|-----------------------|
| $\text{Co}_{1/3}\text{-SnS}_2$              | 6.649              | 562.4                 |
| $\text{Co}_{1/3}\text{-SnO}_2$              | 5.968              | 734.5                 |
| $\text{Co}_{1/3}\text{-SnS}_2/\text{SnO}_2$ | 3.975              | 434.7                 |

## 2. Calculation of ion diffusion coefficient ( $D_{\text{Li}}$ and $D_{\text{Na}}$ )

The GITT data was obtained at the 2nd cycle on a LAND constant current charging and discharging system. The ion diffusion coefficient reflecting the dynamic behavior of the electrodes can be calculated based on the following equation:

$$D = \frac{4}{\pi\tau} \left( \frac{m_B v_m}{M_B S} \right)^2 \left( \frac{\Delta E_s}{\Delta E_\tau} \right)^2 \left( \tau \ll \frac{L^2}{D} \right) \quad (S1)$$

Where  $D$  is the ion diffusion coefficient ( $\text{cm}^2 \text{s}^{-1}$ ),  $\tau$  is the constant current pulse time (s),  $m_B$  is the quantity of the active material (g),  $v_m$  is the molar volume of active material ( $\text{cm}^3 \text{mol}^{-1}$ ),  $M_B$  is relative molecular mass ( $\text{g mol}^{-1}$ ) of active material, respectively,  $S$  is the area where the electrode is in contact with the electrolyte ( $\text{cm}^2$ ),  $\Delta E_s$  represents the steady-state voltage change by the current pulse and  $\Delta E_\tau$  is the potential change (V) during the constant current pulse.
